# Supplementary material for: Pathways of N2O production by marine ammonia-oxidizing archaea determined from dual-isotope labeling
Source: PubMed Central journal article supplement — Proc Natl Acad Sci U S A. 2023 Mar 8;120(11):e2220697120. doi: 10.1073/pnas.2220697120 (PMC10243131; doi:10.1073/pnas.2220697120), 2023-03-08
Supplement: pnas.2220697120.sapp.pdf [file pnas.2220697120.sapp.pdf]

4 **Supplementary Information for**

5 Pathways of N<sub>2</sub>O production by marine ammonia-oxidizing archaea determined from dual-  
6 isotope labeling

7  
8 Xianhui S. Wan<sup>a1</sup>, Lei Hou<sup>b,c</sup>, Shuh-Ji Kao<sup>b</sup>, Yao Zhang<sup>b</sup>, Hua-Xia Sheng<sup>b</sup>, Hui Shen<sup>b</sup>, Senwei Tong<sup>b</sup>, Wei  
9 Qin<sup>c</sup>, Bess B. Ward<sup>a1</sup>

10 <sup>a</sup> Department of Geosciences, Princeton University, NJ 08544, USA.

11 <sup>b</sup> State Key Laboratory of Marine Environmental Sciences, Xiamen University, Xiamen 361101, China.

12 <sup>c</sup> Department of Microbiology and Plant Biology, Institute for Environmental Genomics, University of  
13 Oklahoma, OK 73019, USA.

14 <sup>1</sup> Corresponding authors: Xianhui S. Wan, Bess B. Ward

15 **Author Contributions:** X. S. W., W. Q. and B. B. W. designed research; X. S. W., L. H., H. X. S., H. S.  
16 and S. T. performed experiments; S. J. K. and Y. Z. contributed new reagents/analytic tools; X. S. W., W.  
17 Q., and B. B. W. analyzed data; X. S. W. and B. B. W. wrote the paper with inputs from all authors.

18 **Competing Interest Statement:** The authors declare no competing interest.

19 **Classification:** Microbiology; Earth, Atmosphere and Planetary Sciences

20 **Keywords:** Nitrous oxide, ammonia-oxidizing archaea; dual isotope; marine N<sub>2</sub>O production pathways,  
21 kinetics

22  
23 **This PDF file includes:**

24       Supplementary text 1-3

25       Figures S1 to S3

26       Tables S1

27       SI References

28

## 29 **Supplementary Text**

### 30 **Supplementary Text 1: Compare the $^{45}\text{N}_2\text{O}$ production ratio observed in the field**

31 Our findings are important for interpretation of isotope labeling patterns observed in isotope tracer  
32 experiments in the ocean. When expressed as a fraction of the total ( $^{45}\text{N}_2\text{O}/(^{45}\text{N}_2\text{O} + ^{46}\text{N}_2\text{O})$ ), apparent hybrid  
33 formation ranged from 0.24 to 0.85 across the range of  $\text{NH}_4^+:\text{NO}_2^-$  concentration ratios from 0.05 to 10 (*SI*  
34 *Appendix*, Fig. S1). In this experiment  $^{45}\text{N}_2\text{O}$  is truly hybrid, i.e., composed of N from two different sources.  
35  $^{46}\text{N}_2\text{O}$ , however, could be partially hybrid, because it might result from the combination of two different  
36 compounds, both derived from the initially labeled  $^{15}\text{NH}_4^+$  (see result from experiment 3 and 5). In a standard  
37 isotope tracer experiment performed with natural seawater samples, it is usually assumed that none of the  
38 observed  $^{46}\text{N}_2\text{O}$  is hybrid. Thus, the amount of hybrid  $\text{N}_2\text{O}$  might be underestimated if we consider only  
39  $^{45}\text{N}_2\text{O}$ . Recent  $^{15}\text{N}$  labeling experiments consistently observe a high fraction of  $^{45}\text{N}_2\text{O}$  production (i.e., > 70%)  
40 in the world's ocean including the mid-latitude North Atlantic (1), the western North Pacific (2), and the  
41 Eastern Tropical South Pacific (3-4), indicating that the hybrid formation is the main source of  $\text{N}_2\text{O}$  in the  
42 ocean. A more recent manipulation further found that the  $^{45}\text{N}_2\text{O} : ^{46}\text{N}_2\text{O}$  was insensitive to  $^{15}\text{NH}_4^+ : ^{14}\text{NO}_2^-$   
43 ratio when these substrates were experimentally manipulated in the Eastern Tropical North Pacific (5).  
44 Currently, we are unable to explain the discrepancy of  $^{45}\text{N}_2\text{O} : ^{46}\text{N}_2\text{O}$  production in response to  $^{15}\text{NH}_4^+ : ^{14}\text{NO}_2^-$   
45 ratio between SCM1 culture and the field studies. However, several factors, including the influence of  $^{14}\text{NH}_4^+$   
46 concentration in the natural environments, the isotope dilution of the tracer substrates, and ammonia  
47 oxidation coupled to  $\text{NO}_2^-$  reduction during the incubation, would also cause deviation of the measured  
48  $^{45}\text{N}_2\text{O} : ^{46}\text{N}_2\text{O}$  from the predicted ratio (6). The potential involvement of microbial  $\text{N}_2\text{O}$  production from other  
49 members of the microbial community also complicates the interpretation of the observed  $^{45}\text{N}_2\text{O} : ^{46}\text{N}_2\text{O}$  in the  
50 field. Nevertheless, the field data suggest that further experiments with  $^{15}\text{NO}_2^-$  tracers or more tests using  
51 other marine AOA strains would be useful, but also that interpretation of the hybrid isotope signature in  
52 marine samples is not straightforward.

### 53 **Supplementary Text 2. Using O atom source to deduce $\text{NO}_2^-$ production pathways**

54 Based on the result that half of O atoms in  $\text{NO}_2^-$  produced by marine AOA strain CN25 were sourced from  
55  $\text{H}_2\text{O}$ , a stepwise oxidation of  $\text{NH}_2\text{OH}$  to  $\text{NO}_2^-$  via NO was proposed as the ammonia oxidation pathway in  
56 AOA (7-8). A similar model was also proposed in AOB (9), although the enzyme catalysing the oxidation of  
57 NO to  $\text{NO}_2^-$  remains to be identified. Alternatively,  $\text{NO}_2^-$  was also hypothesized to be produced by a reaction  
58 between  $\text{NH}_2\text{OH}$  and NO that yields two molecules of  $\text{NO}_2^-$ , in which the NO was produced by  $\text{NO}_2^-$   
59 reduction (10). In this model, 2/3 of O atoms should be sourced from  $\text{H}_2\text{O}$  and the remaining 1/3 of O atoms  
60 from  $\text{O}_2$ . In our experiment, 63% of O atoms in  $\text{NO}_2^-$  were sourced from  $\text{H}_2\text{O}$ , which is close to the 2/3 value  
61 predicted for  $\text{NO}_2^-$  produced by  $\text{NH}_2\text{OH}$  and NO. However, it should be noted that any abiotic intracellular  
62 O atom exchange between  $\text{NO}_2^-$  and  $^{18}\text{O}\text{-H}_2\text{O}$  would increase the portion of  $\text{H}_2\text{O}$  as the O source for  $\text{NO}_2^-$ .  
63 For instance, if  $\text{NO}_2^-$  is produced via  $\text{NH}_2\text{OH}$  oxidation, an intracellular O atom exchange ratio of 26% is

64 required to explain the ratio observed in our study. On the other hand, O<sub>2</sub> accounted for ~26% of O atoms in  
65 NO<sub>2</sub><sup>-</sup>, which was lower than the predicted values in both scenarios (50% in NH<sub>2</sub>OH oxidation pathway and  
66 33% in NH<sub>2</sub>OH plus NO pathway). The low value might be attributed to intracellular O atom exchange,  
67 which would reduce the apparent contribution of O<sub>2</sub> to NO<sub>2</sub><sup>-</sup>. Incomplete equilibration of <sup>18</sup>O<sub>2</sub> in the  
68 headspace with DO in the medium could also lower the contribution of O<sub>2</sub> to NO<sub>2</sub><sup>-</sup>, although this seems  
69 unlikely. Nevertheless, our results suggest a significantly higher contribution from H<sub>2</sub>O than O<sub>2</sub> for the O  
70 atoms in NO<sub>2</sub><sup>-</sup>. Based on the importance of substrate ratio (NH<sub>4</sub><sup>+</sup>: NO<sub>2</sub><sup>-</sup>) in determining the N sources for  
71 N<sub>2</sub>O, it is possible that the relative contribution of different O sources might also vary with substrate ratio.

### 72 **Supplemental Text 3: Choice of preservative for N<sub>2</sub>O and NO<sub>2</sub><sup>-</sup> production studies**

73 Mercuric chloride (HgCl<sub>2</sub>) has been widely used as a preservative to terminate microbial activities due to its  
74 high toxicity and high solubility in water (11, 12). In hopes of minimizing the use of this toxic material, and  
75 due to concerns about the potential for artefacts of HgCl<sub>2</sub> on N<sub>2</sub>O production, we compared the effect of  
76 HgCl<sub>2</sub> and sodium hydroxide (NaOH) on both NO<sub>2</sub><sup>-</sup> and N<sub>2</sub>O production for three cell treatments and three  
77 <sup>15</sup>N-labelled substrates (Preservative test in Table S1). Our results suggested that both HgCl<sub>2</sub> and NaOH  
78 effectively stopped SCM1 activity, and similarly preserved the isotope signal in NO<sub>2</sub><sup>-</sup> and N<sub>2</sub>O during <sup>15</sup>NH<sub>4</sub><sup>+</sup>  
79 labelling incubations (*SI Appendix*, Fig. S3A-D). In contrast, N<sub>2</sub>O isotopes were differentially affected by the  
80 two preservatives in <sup>15</sup>NO<sub>2</sub><sup>-</sup> labelling incubations. HgCl<sub>2</sub> resulted in significantly higher δ<sup>15</sup>N-N<sub>2</sub>O than using  
81 NaOH in both the viable cell and heat killed cell treatments, indicating the application of HgCl<sub>2</sub> induces an  
82 artefact of N<sub>2</sub>O production from NO<sub>2</sub><sup>-</sup> associated pathways (*SI Appendix*, Fig. S3E, F). The <sup>15</sup>NO<sub>3</sub><sup>-</sup> labelling  
83 experiment was performed only in the viable cell group. There was no significant change in δ<sup>15</sup>N-N<sub>2</sub>O during  
84 incubation in either HgCl<sub>2</sub> or NaOH treatments, indicating that NO<sub>3</sub><sup>-</sup> was not involved in archaeal N<sub>2</sub>O  
85 production (*SI Appendix*, Fig. S3G). Therefore, we concluded that NaOH is a better preservative to study  
86 archaeal N<sub>2</sub>O production, and NaOH was chosen as the preservative for all further experiments reported here.  
87

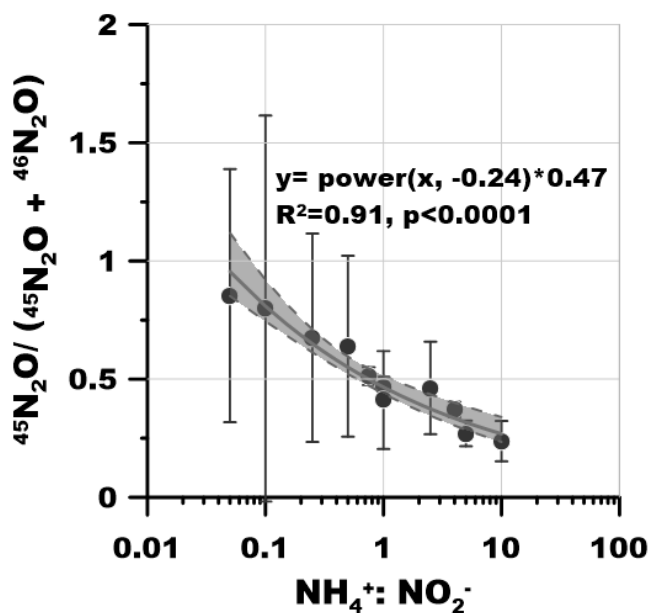

89  
90 **Fig. S1. Fraction of  $^{45}\text{N}_2\text{O}$  to total labeled  $\text{N}_2\text{O}$  production under different  $^{15}\text{NH}_4^+ : ^{14}\text{NO}_2^-$  ratios.**  
91 Regression between  $^{45}\text{N}_2\text{O} : (^{45}\text{N}_2\text{O} + ^{46}\text{N}_2\text{O})$  production rate against  $^{15}\text{NH}_4^+$  and  $^{14}\text{NO}_2^-$  concentration ratio.  
92 Error bars represent propagated standard deviation from triplicate samples.  
93

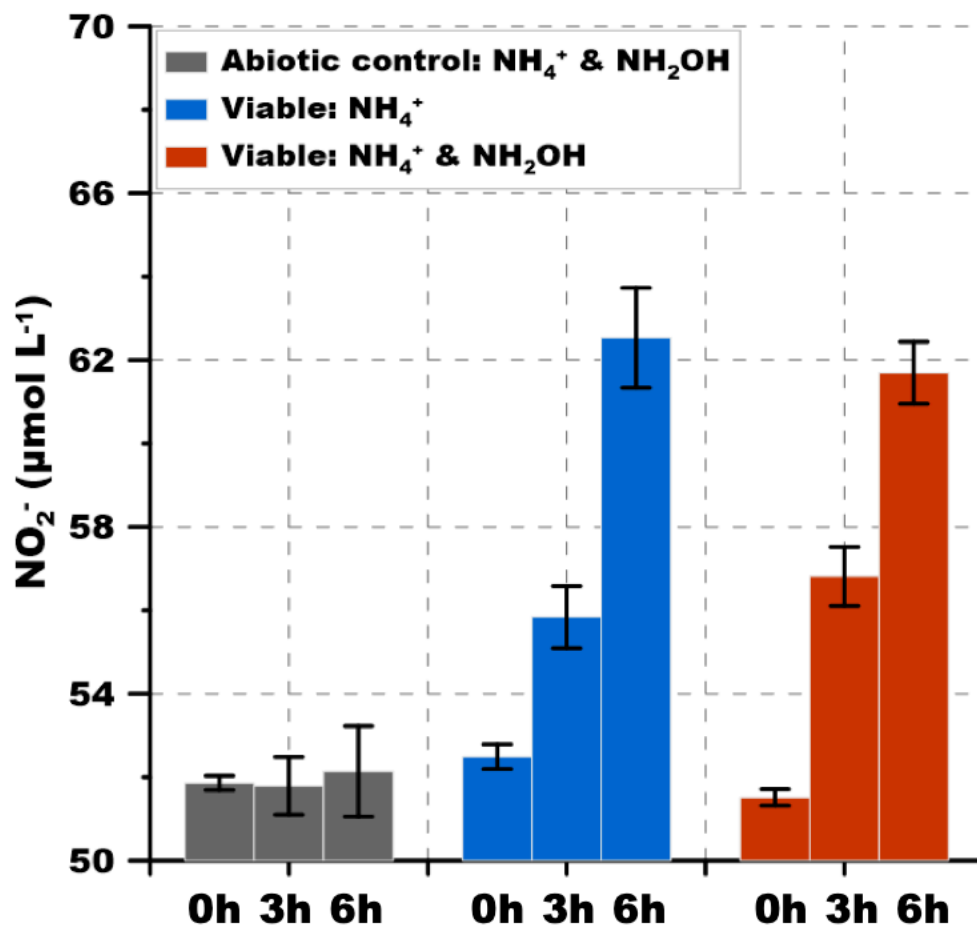

94  
95  
96  
97  
98  
99

**Fig. S2. Impact of NH<sub>2</sub>OH on NO<sub>2</sub><sup>-</sup> production rate.** Gary bars: abiotic control using filtrate with NH<sub>4</sub><sup>+</sup> (50 µmol L<sup>-1</sup>) and NH<sub>2</sub>OH (1 µmol L<sup>-1</sup>). Blue bars: viable cell with NH<sub>4</sub><sup>+</sup> (50 µmol L<sup>-1</sup>). Red bars: viable cell with NH<sub>4</sub><sup>+</sup> (50 µmol L<sup>-1</sup>) and NH<sub>2</sub>OH (1 µmol L<sup>-1</sup>). Error bars represent standard deviation from triplicate samples.

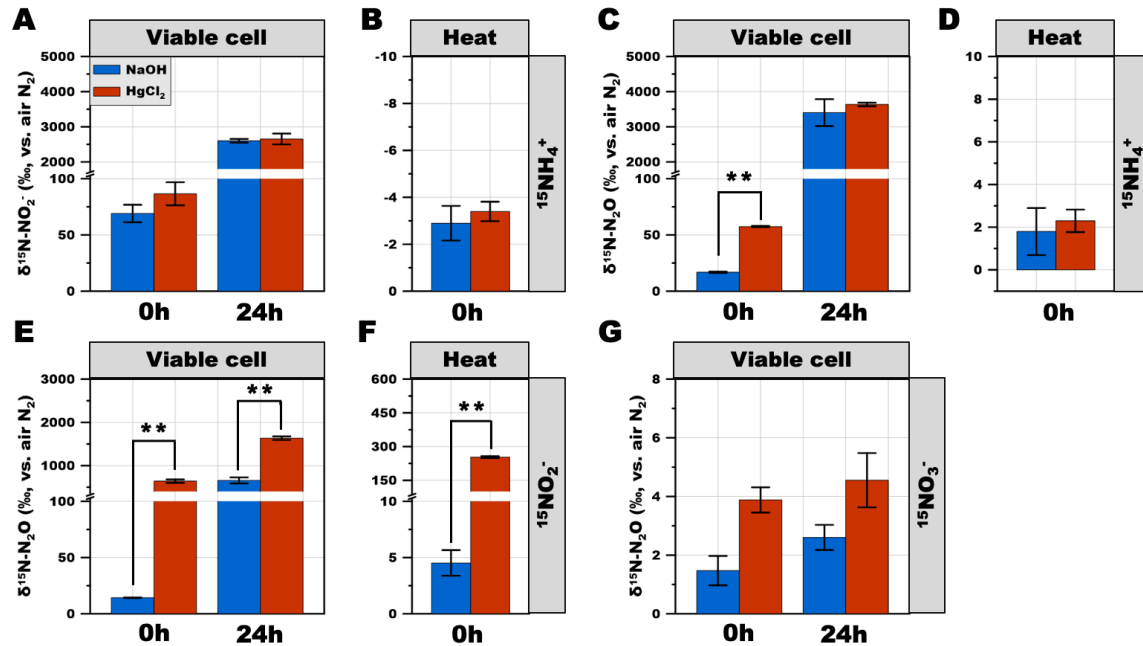

100

101 **Fig. S3. Preservative Test for the effects of NaOH and  $\text{HgCl}_2$  on  $\text{NO}_2^-$  and  $\text{N}_2\text{O}$  production.** A-B,  $\delta^{15}\text{N-}$   
 102  $\text{NO}_2^-$  in cells amended with  $50 \mu\text{mol L}^{-1}$  of  $^{15}\text{NH}_4^+$ . C-D,  $\delta^{15}\text{N-N}_2\text{O}$  in cells amended with  $50 \mu\text{mol L}^{-1}$  of  
 103  $^{15}\text{NH}_4^+$ . E-F,  $\delta^{15}\text{N-N}_2\text{O}$  in cells amend with  $40 \mu\text{mol L}^{-1}$  of  $^{15}\text{NO}_2^-$ . G, Change of  $\delta^{15}\text{N-N}_2\text{O}$  during  $^{15}\text{NO}_3^-$   
 104 labeling incubation. The X-axis marks time of adding preservatives after  $^{15}\text{N}$  tracer amendment. The  $\delta^{15}\text{N}$  in  
 105 NaOH treatment is shown in blue bars and the results of  $\text{HgCl}_2$  treatment are shown in red bars. Error bars  
 106 represent standard deviation from triplicate samples. The stars (\*\*) represent significance difference at  
 107  $p < 0.01$  level. Note Y-axes differ in scale.

108

**Table S1. Summary of experimental treatments.**

| Exp. <sup>1</sup>      | Cell treatment                                                       | Tracers                                                                                                                                                                                                                                                                                                                                    | Preserve                        | Target                                                                                                                                                                                      | Time points                                                                                             |
|------------------------|----------------------------------------------------------------------|--------------------------------------------------------------------------------------------------------------------------------------------------------------------------------------------------------------------------------------------------------------------------------------------------------------------------------------------|---------------------------------|---------------------------------------------------------------------------------------------------------------------------------------------------------------------------------------------|---------------------------------------------------------------------------------------------------------|
| Preserv-<br>ative test | 1) Viable cells<br>2) Autoclaved<br>cells                            | 1) <sup>15</sup> NH <sub>4</sub> <sup>+</sup> : 50 μM<br>2) <sup>15</sup> NO <sub>2</sub> <sup>-</sup> : 50 μM<br>3) <sup>15</sup> NO <sub>3</sub> <sup>-</sup> : 100 μM                                                                                                                                                                   | 1) HgCl <sub>2</sub><br>2) NaOH | Determine the best<br>way to terminate<br>incubations and<br>preserve N <sub>2</sub> O                                                                                                      | 0, 24h (for<br>viable cells)                                                                            |
| 1                      | 1) Viable cells                                                      | 1) <sup>15</sup> NH <sub>4</sub> <sup>+</sup> : 0.1, 0.5, 1,<br>1.5, 2, 5, 8, 10 μM                                                                                                                                                                                                                                                        | 1) NaOH                         | Explore the<br>ammonia and N <sub>2</sub> O<br>production kinetics                                                                                                                          | 3 timepoints                                                                                            |
| 2                      | 1) Viable cells                                                      | 1) <sup>15</sup> NH <sub>4</sub> <sup>+</sup> + <sup>14</sup> NO <sub>2</sub> <sup>-</sup> :<br>1.5 & 15 μM<br>2) <sup>15</sup> NH <sub>4</sub> <sup>+</sup> + <sup>14</sup> NO <sub>2</sub> <sup>-</sup> :<br>5 & 5 μM<br>3) <sup>15</sup> NH <sub>4</sub> <sup>+</sup> + <sup>14</sup> NO <sub>2</sub> <sup>-</sup> :<br>10 & 1 μM       | 1) NaOH                         | Investigate the<br>impact of NH <sub>4</sub> <sup>+</sup> :<br>NO <sub>2</sub> <sup>-</sup> on N <sub>2</sub> O<br>production                                                               | 0, 6, 24h                                                                                               |
| 3                      | 1) Viable cells<br>(washed by<br>fresh medium)                       | 1) <sup>15</sup> NH <sub>4</sub> <sup>+</sup> : 20 μM<br>2) <sup>15</sup> NH <sub>4</sub> <sup>+</sup> + <sup>14</sup> NO <sub>2</sub> <sup>-</sup> :<br>20 & 20 μM<br>3) <sup>15</sup> NO <sub>2</sub> <sup>-</sup> : 20 μM<br>4) <sup>15</sup> NO <sub>2</sub> <sup>-</sup> + <sup>14</sup> NH <sub>4</sub> <sup>+</sup> :<br>20 & 20 μM | 1) NaOH                         | Track the source of<br>N atoms using <sup>15</sup> N<br>substrates                                                                                                                          | 0, 24h                                                                                                  |
| 4                      | 1) Viable cells<br>2) Filtrate                                       | 1) <sup>15</sup> NH <sub>2</sub> OH: 1 μM<br>2) <sup>15</sup> NO <sub>2</sub> <sup>-</sup> : 10 μM<br>3) <sup>15</sup> NO <sub>2</sub> <sup>-</sup> + <sup>4</sup> NH <sub>2</sub> OH:<br>10 & 1 μM                                                                                                                                        | 1) NaOH                         | Examine N <sub>2</sub> O<br>production from<br>NH <sub>2</sub> OH                                                                                                                           | Time course (0,<br>1, 3, 6, 12 h)                                                                       |
| 5                      | 1) Viable cells<br>(washed by<br>fresh medium)<br>2) Fresh<br>medium | 1) H <sub>2</sub> <sup>18</sup> O, NH <sub>4</sub> <sup>+</sup> NO <sub>2</sub> <sup>-</sup> :<br>20 & 20 μM<br>2) <sup>18</sup> O <sub>2</sub> , NH <sub>4</sub> <sup>+</sup> + NO <sub>2</sub> <sup>-</sup> :<br>20 & 20 μM<br>3) NH <sub>4</sub> <sup>+</sup> + N <sup>18</sup> O <sub>2</sub> <sup>-</sup> :<br>20 & 20 μM             | 1) NaOH                         | 1) Track the source<br>of O atoms using<br><sup>18</sup> O substrates<br>2) Quantify the<br>abiotic O atom<br>exchange rate<br>between H <sub>2</sub> O and<br>NO <sub>2</sub> <sup>-</sup> | Time course (0,<br>6, 12, 24h) for<br>selected<br>treatments<br>0, 24h (for the<br>remaining<br>groups) |

110

<sup>1</sup>: All the experiments were carried out in biological triplicates at each timepoint.

111

112 **Supplementary References**

- 113 1. Q. Ji, B. B. Ward, Nitrous oxide production in surface waters of the mid-latitude North Atlantic Ocean.  
114 *J. Geophys. Res. Oceans* 122, 2612-2621 (2017).
- 115 2. F. Breider et al., Response of N<sub>2</sub>O production rate to ocean acidification in the western North Pacific.  
116 *Nat. Clim. Chang.* 12, 954-958 (2019).
- 117 3. C. Frey et al., Regulation of nitrous oxide production in low-oxygen waters off the coast of Peru.  
118 *Biogeosciences* 17, 2263-2287 (2020).
- 119 4. A. E. Santoro, Nitrification and nitrous oxide production in the offshore waters of the Eastern Tropical  
120 South Pacific. *Global Biogeochem. Cy.* 35, e2020GB006716 (2021).
- 121 5. C. Frey et al., Kinetics of nitrous oxide production from ammonia oxidation in the Eastern Tropical  
122 North Pacific. *Limnol. Oceanogr.* doi.org/10.1002/lno.12283 (2022).
- 123 6. X. S. Wan et al., Epipelagic nitrous oxide production offsets carbon sequestration by the biological  
124 pump. *Nat. Geosci.* 16, 29-36 (2023).
- 125 7. P. Carini, C. L. Dupont, A. E. Santoro, Patterns of thaumarchaeal gene expression in culture and diverse  
126 marine environments. *Environ. Microbiol.* 20, 2112-2124 (2018).
- 127 8. A. E. Santoro, C. Buchwald, M. R. McIlvin, K. L. Casciotti, Isotopic signature of N<sub>2</sub>O produced by  
128 marine ammonia-oxidizing archaea. *Science* 333, 1282-1285 (2011).
- 129 9. J. D. Caranto, K. M. Lancaster, Nitric oxide is an obligate bacterial nitrification intermediate produced  
130 by hydroxylamine oxidoreductase. *Proc. Natl. Acad. Sci. U.S.A.* 114, 8217-9222 (2017).
- 131 10. J. A. Kozłowski, M. Stieglmeier, C. Schleper, M. G. Klotz, L. Y. Stein, Pathways and key intermediates  
132 required for obligate aerobic ammonia-dependent chemolithotrophy in bacteria and Thaumarchaeota.  
133 *ISME J.* 10, 1836-1845 (2016).
- 134 11. J. R. Christian, D. M. Karl, Measuring bacterial ectoenzyme activities in marine waters using mercuric  
135 chloride as a preservative and a control. *Mar. Ecol. Prog. Ser.* 123, 217-224 (1995).
- 136 12. D. C. Wolf, T. H. Dao, H. D. Scott, T. L. Lavy, Influence of sterilization methods on selected soil  
137 microbiological, physical, and chemical-properties. *J. Environ. Qual.* 18, 39-44 (1989).
- 138
